# Supplementary material for: Growth of ultralong potassium titanate whiskers by the KCl flux method with metallic titanium materials
Source: Royal Society of Chemistry journal article supplement (doi:10.1039/c2ce00010e), 2012-01-01
Supplement: c2ce00010e.pdf [file c2ce00010e.pdf]

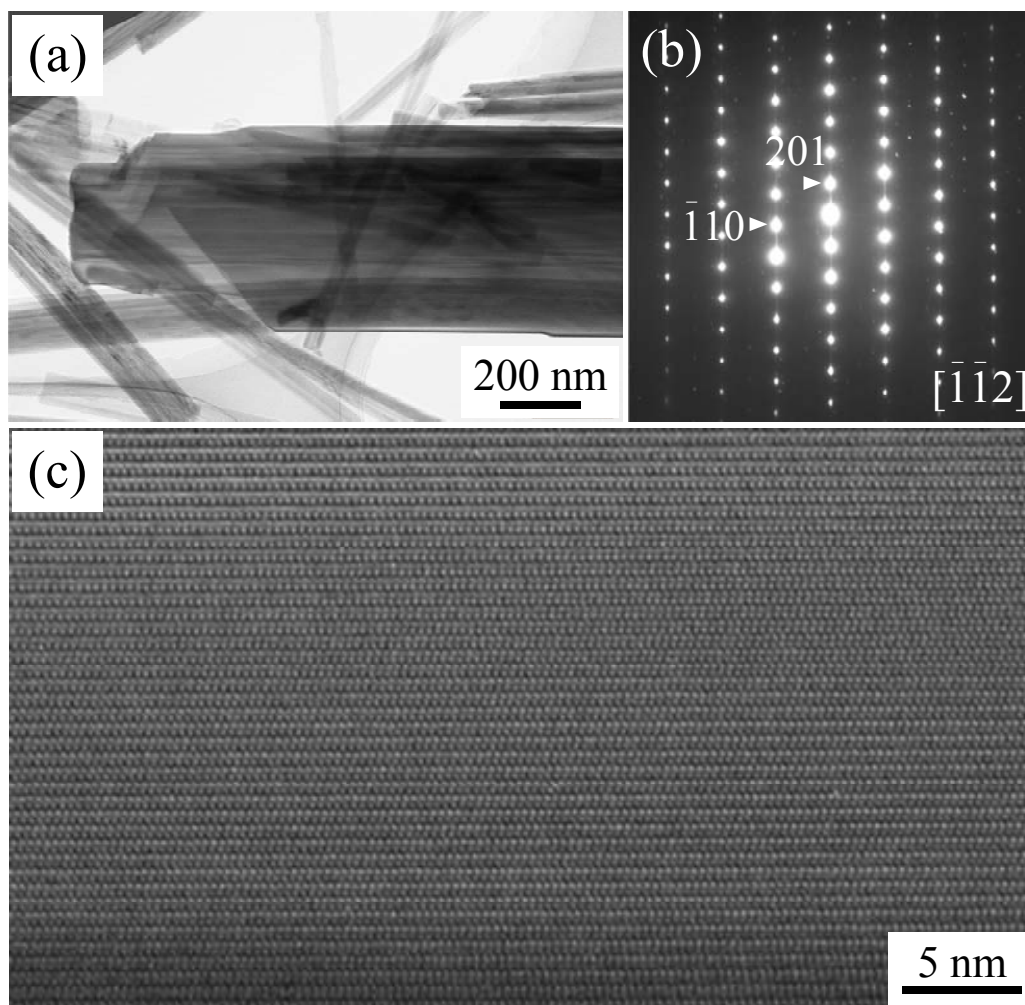

ESI 1 (a) Bright field TEM image, (b) the corresponding SAED pattern and (c) lattice image of typical  $K_2Ti_4O_9$  whiskers grown from Ti powders.

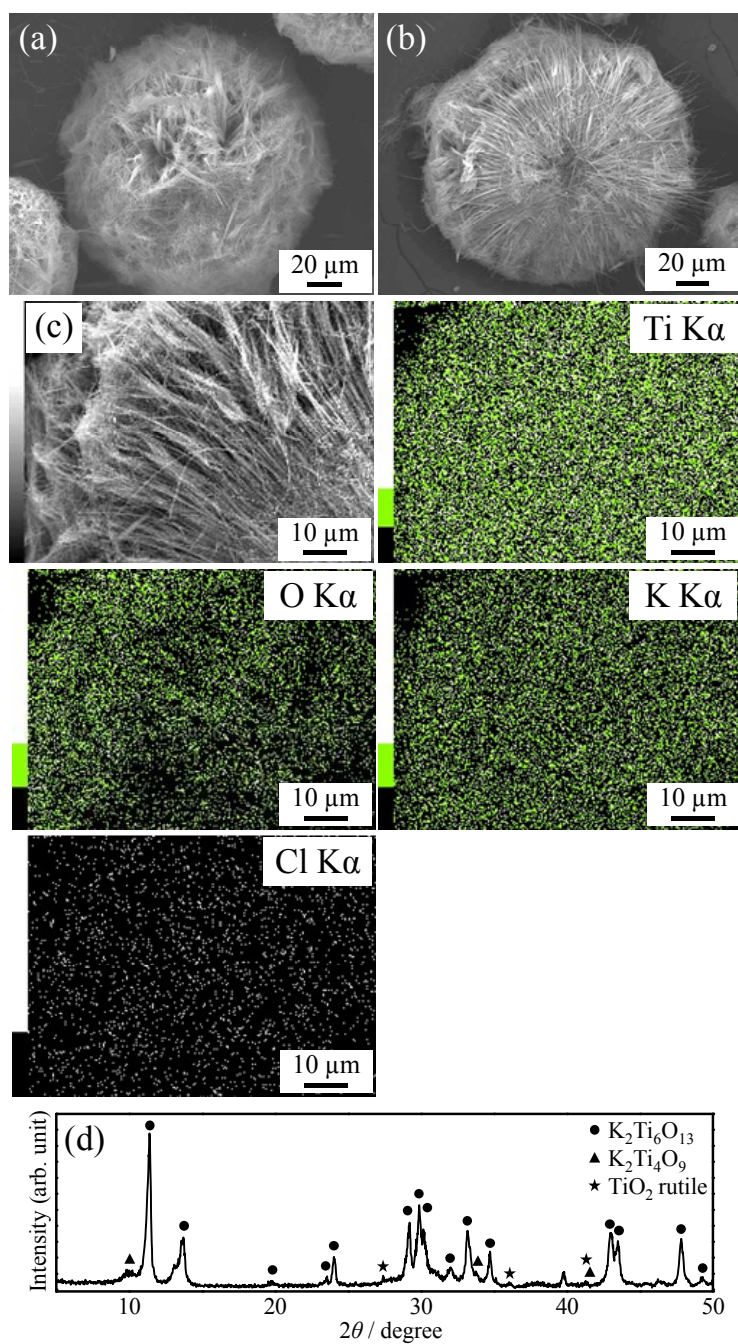

ESI 2 (a) Surface and (b) cross-sectional SEM images, (c) cross-sectional FE-SEM image and the corresponding EDS mappings and (d) XRD pattern of potassium titanate whiskers grown from Ti spheres at 800  $^\circ\text{C}$  for 20 h.
